# Supplementary material for: The Effects of Sub-Regional Climate Velocity on the Distribution and Spatial Extent of Marine Species Assemblages
Source: PubMed Central journal article supplement (PMC4762943; doi:10.1371/journal.pone.0149220), 2016-02-22

**a.**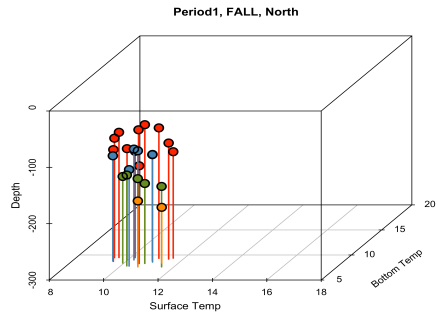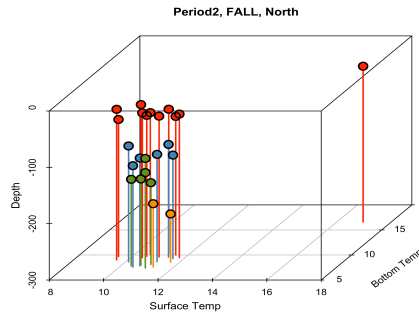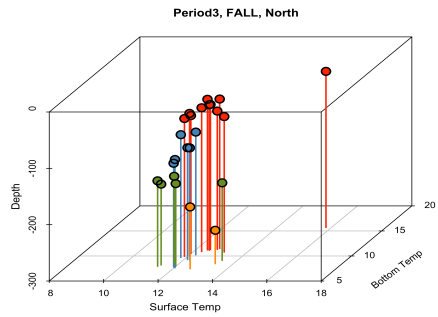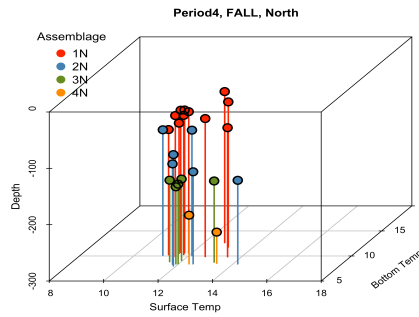**b.**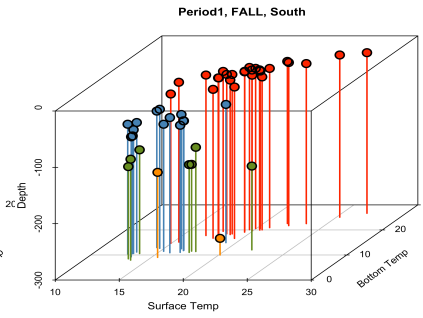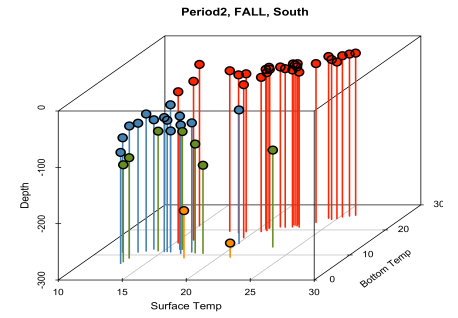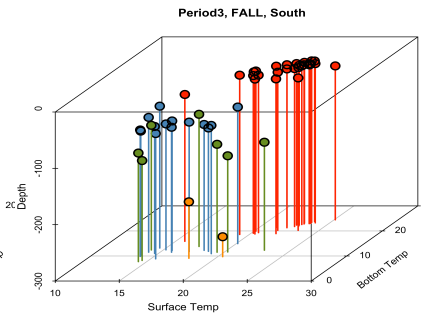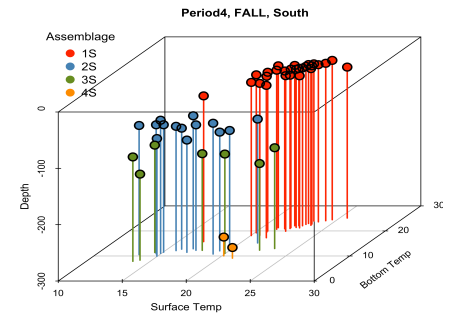**c.**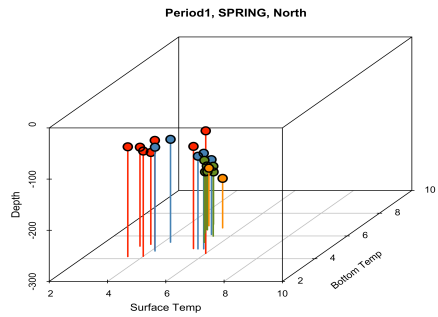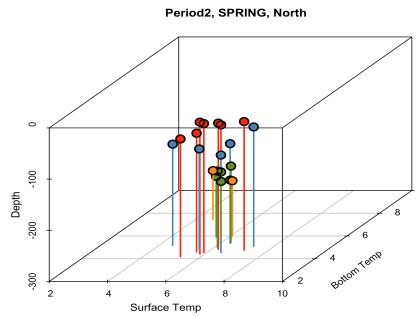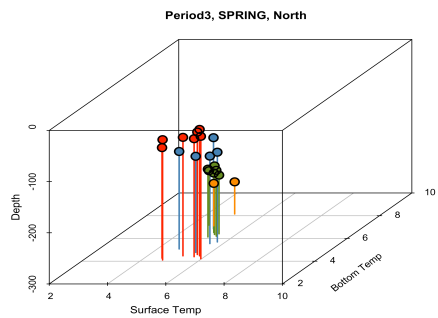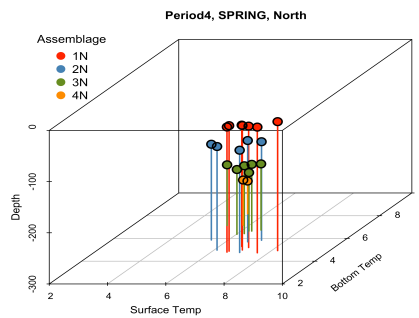**d.**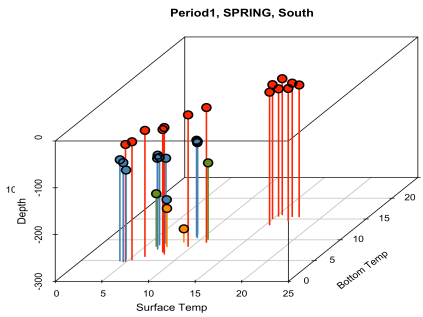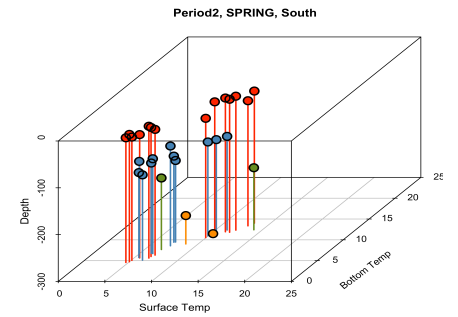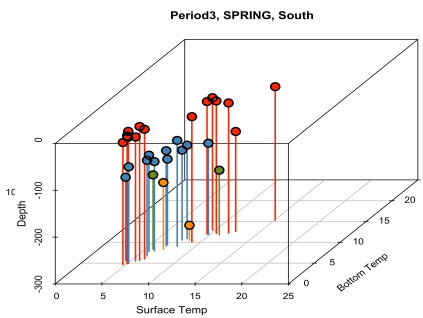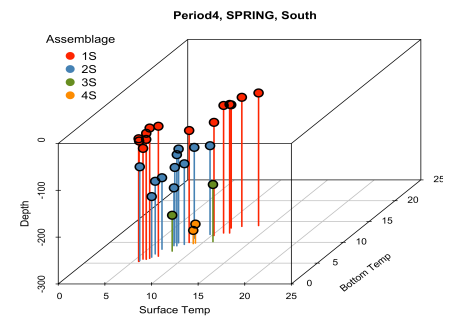

Supplement: pone.0149220.s005.pdf [file pone.0149220.s005.pdf]
