# Supplementary material for: The Effects of Sub-Regional Climate Velocity on the Distribution and Spatial Extent of Marine Species Assemblages
Source: PubMed Central journal article supplement (PMC4762943; doi:10.1371/journal.pone.0149220), 2016-02-22

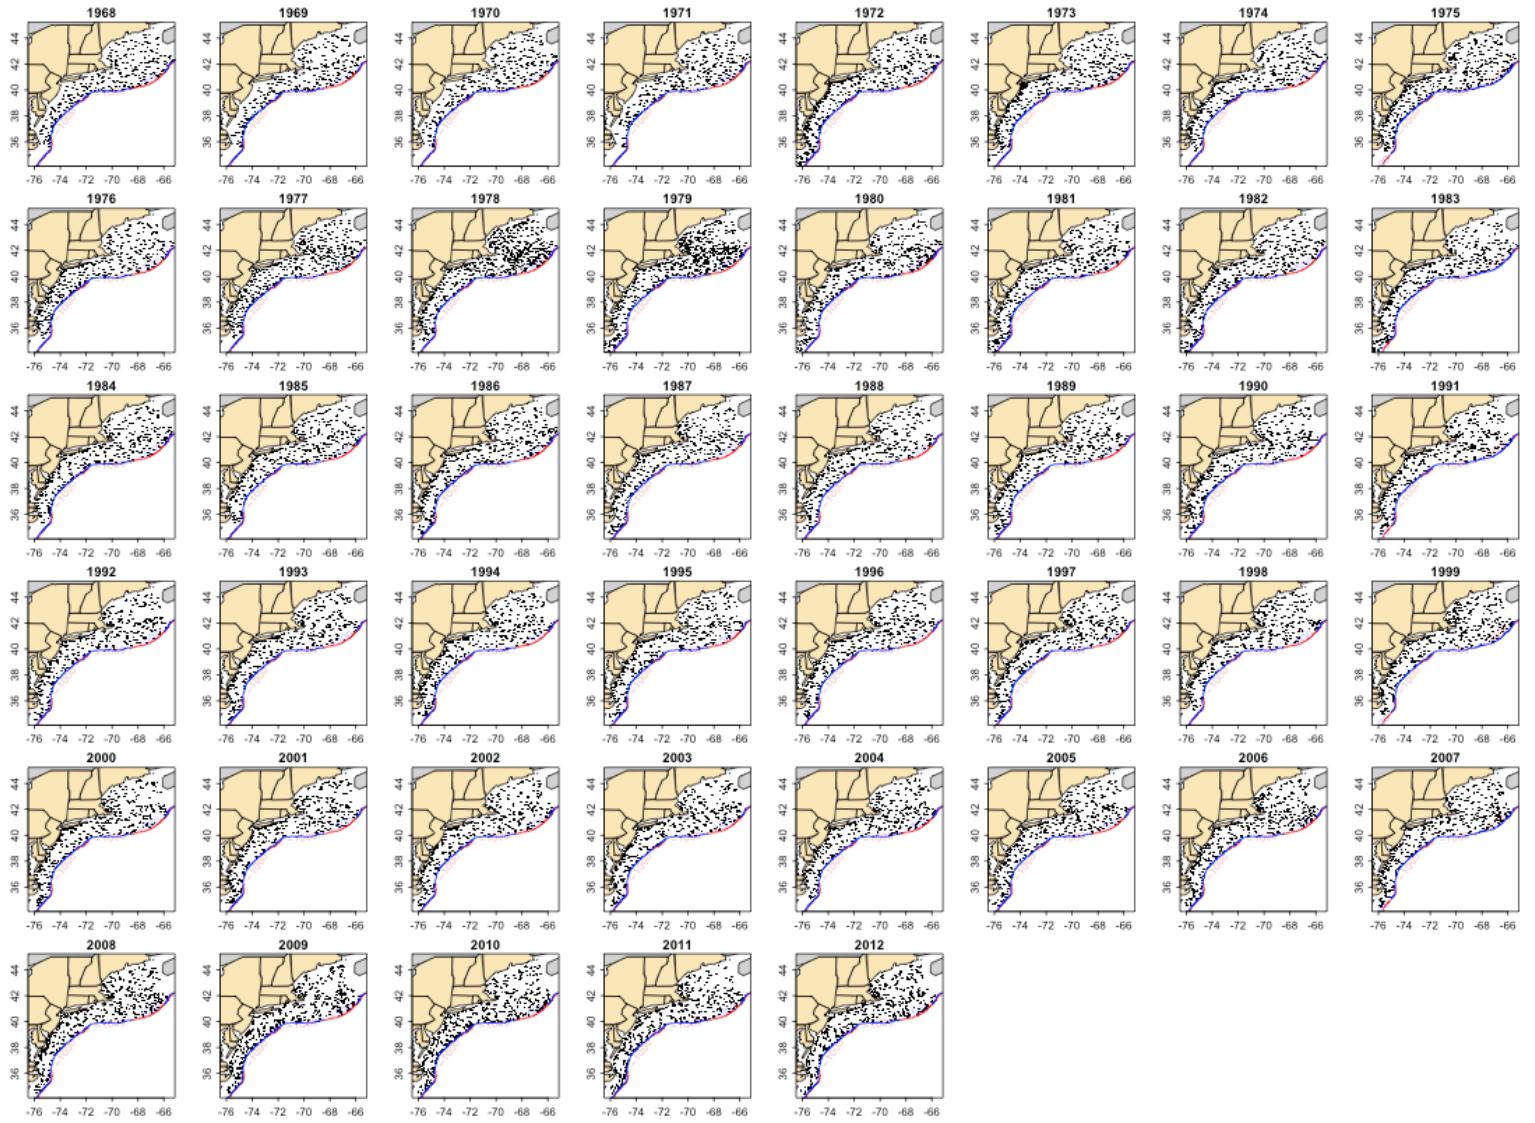

Supplement: pone.0149220.s003.pdf [file pone.0149220.s003.pdf]
